# Supplementary material for: Factors shaping the gut bacterial community assembly in two main Colombian malaria vectors
Source: PubMed Central journal article supplement (PMC6112144; doi:10.1186/s40168-018-0528-y), 2018-08-27

**A**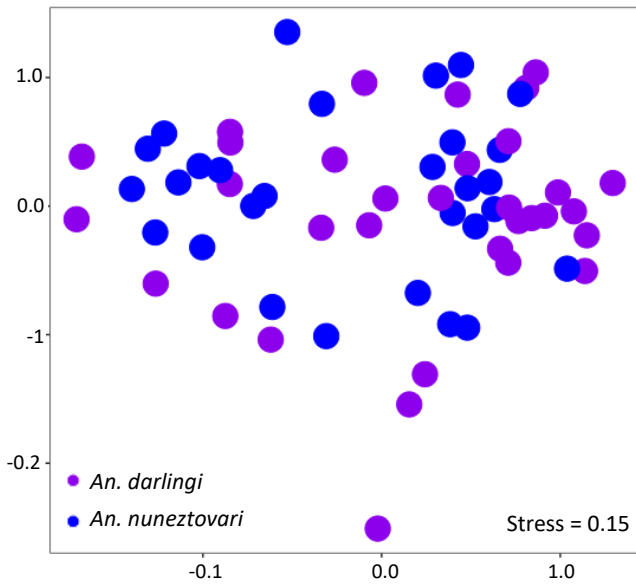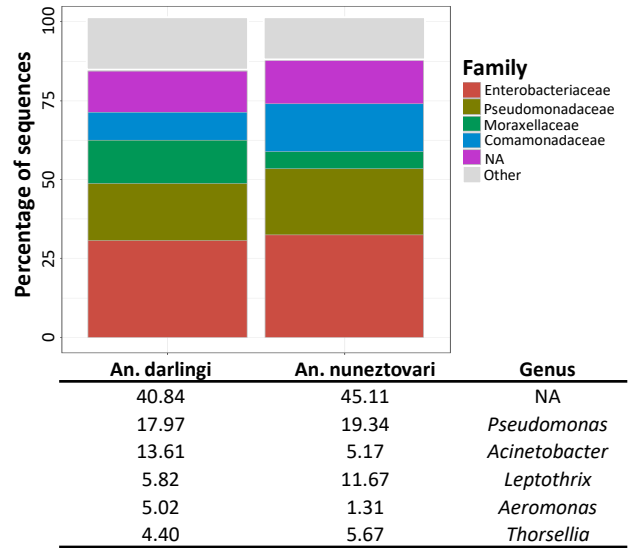**B**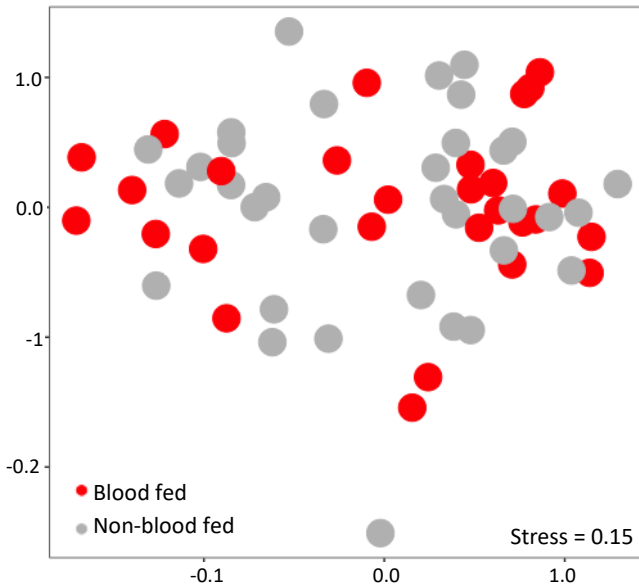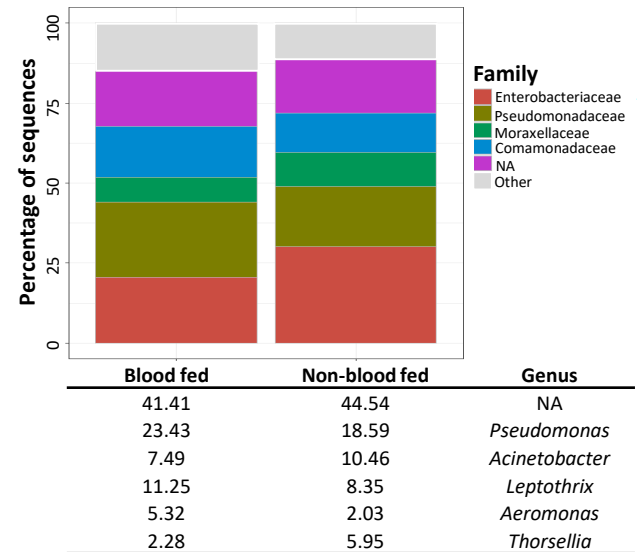**C**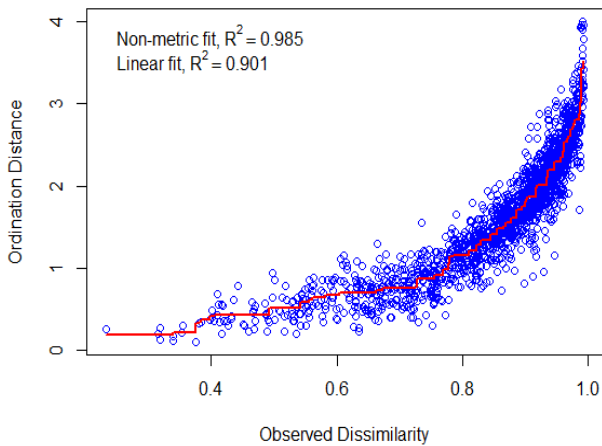

Supplement: 40168_2018_528_MOESM4_ESM.pdf [file 40168_2018_528_MOESM4_ESM.pdf]
