# Supplementary material for: Factors shaping the gut bacterial community assembly in two main Colombian malaria vectors
Source: PubMed Central journal article supplement (PMC6112144; doi:10.1186/s40168-018-0528-y), 2018-08-27
Supplement: 40168_2018_528_MOESM7_ESM.pdf [file 40168_2018_528_MOESM7_ESM.pdf]

## Rarefied

Fig 1A

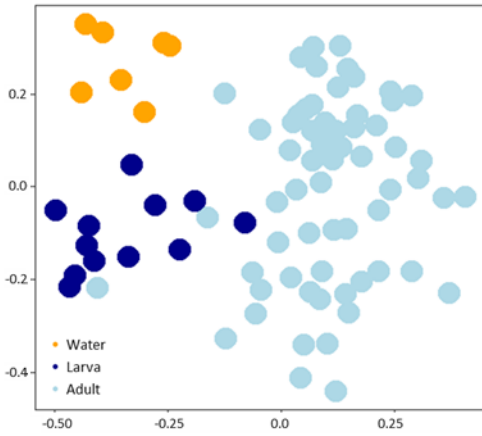

## Not rarefied

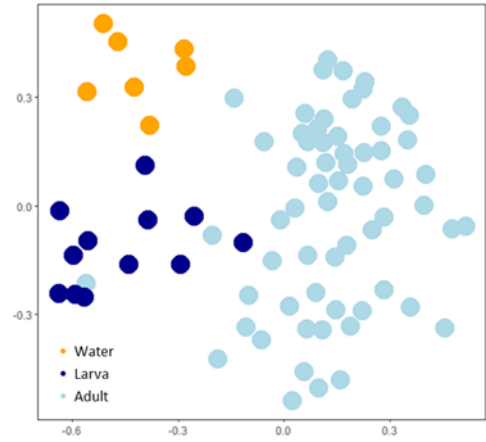

Fig 2C

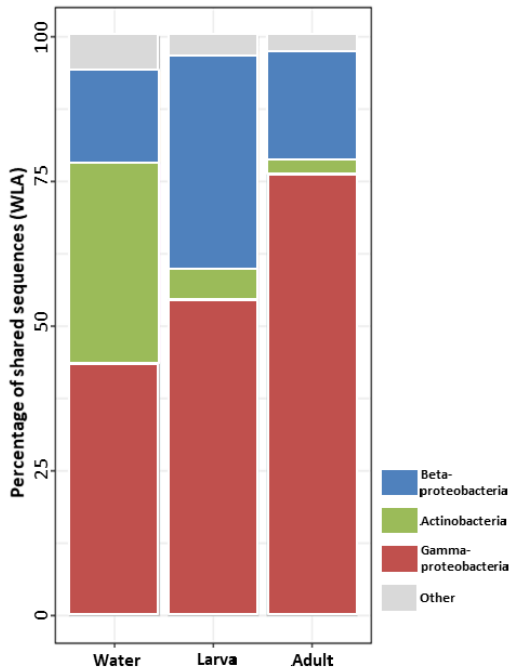

| Rarefied N=1532 | Class               | Ws       | Larva    | Adult    |
|-----------------|---------------------|----------|----------|----------|
|                 | Gammaproteobacteria | 43.57126 | 54.49485 | 76.2576  |
|                 | Actinobacteria      | 34.63802 | 5.518846 | 2.325185 |
|                 | Betaproteobacteria  | 15.72042 | 37.41617 | 19.2701  |

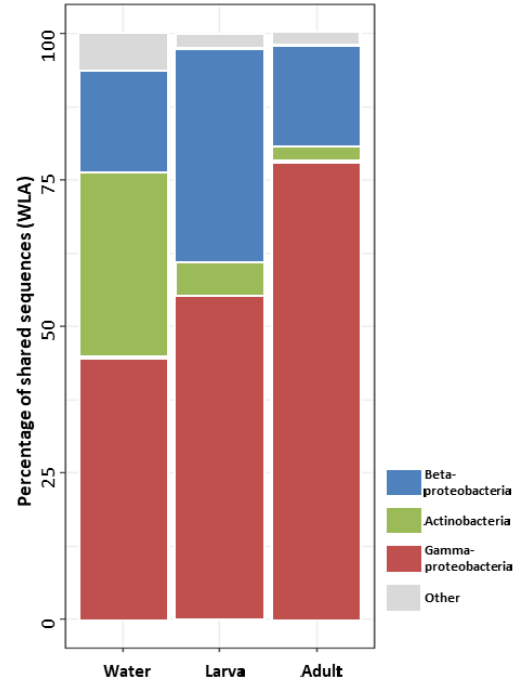

| Not Rarefied N=2142 | Class               | Ws       | Larva    | Adults   |
|---------------------|---------------------|----------|----------|----------|
|                     | Gammaproteobacteria | 44.18522 | 54.88268 | 78.37768 |
|                     | Actinobacteria      | 31.77652 | 6.03035  | 2.382757 |
|                     | Betaproteobacteria  | 18.05361 | 36.45133 | 17.05406 |

## Additional file 3A

| Genus                | An. nuneztovari | An. darlingi |
|----------------------|-----------------|--------------|
| NA                   | 45.11           | 40.84        |
| <i>Pseudomonas</i>   | 19.34           | 17.97        |
| <i>Acinetobacter</i> | 5.17            | 13.61        |
| <i>Leptothrix</i>    | 11.67           | 5.82         |
| <i>Aeromonas</i>     | 1.31            | 5.02         |
| <i>Thorsellia</i>    | 5.67            | 4.40         |

| Genus                | An. nuneztovari | An. darlingi |
|----------------------|-----------------|--------------|
| NA                   | 49.00           | 42.06        |
| <i>Pseudomonas</i>   | 20.24           | 17.97        |
| <i>Acinetobacter</i> | 7.89            | 12.34        |
| <i>Leptothrix</i>    | 9.76            | 5.17         |
| <i>Aeromonas</i>     | 1.20            | 5.31         |
| <i>Thorsellia</i>    | 3.92            | 3.97         |
